# Supplementary material for: Hydroxyl reduced silver nanoparticles on ultrathin boron imidazolate framework nanosheets for electrocatalytic CO2 reduction
Source: Royal Society of Chemistry journal article supplement (doi:10.1039/d3se00587a), 2023-01-01
Supplement: d3se00587a1.pdf [file d3se00587a1.pdf]

**Electronic Supplementary Information (ESI) for Inorganic Chemistry Frontiers**

**Hydroxy Reduced Silver Nanoparticles on Ultrathin Boron Imidazolate  
Framework Nanosheet for Electrocatalytic CO<sub>2</sub> Reduction**

Ping Shao<sup>a,b</sup>, Luocai Yi<sup>b</sup>, Jun-Qiang Chen<sup>b</sup>, Changsheng Cao<sup>b</sup>, Hai-Xia Zhang<sup>b\*</sup> and

Jian Zhang<sup>b\*</sup>

*<sup>a</sup>College of Chemistry, Fuzhou University, Fuzhou, Fujian 350108, P. R. China.*

*<sup>b</sup>State Key Laboratory of Structural Chemistry, Fujian Institute of Research on the  
Structure of Matter, Chinese Academy of Sciences, Fuzhou, Fujian 350002, P. R.  
China.*

Email: [zhanghaixia@fjirsm.ac.cn](mailto:zhanghaixia@fjirsm.ac.cn); [zhj@fjirsm.ac.cn](mailto:zhj@fjirsm.ac.cn).

## Contents

|                  |   |
|------------------|---|
| Figure S1. ....  | 2 |
| Figure S2. ....  | 3 |
| Figure S3. ....  | 3 |
| Figure S4. ....  | 3 |
| Figure S5. ....  | 4 |
| Figure S6. ....  | 4 |
| Figure S7. ....  | 4 |
| Figure S8. ....  | 5 |
| Figure S9. ....  | 5 |
| Figure S10. .... | 5 |
| Figure S11. .... | 6 |
| Figure S12. .... | 6 |
| Figure S13. .... | 6 |
| Figure S14. .... | 7 |
| Figure S15. .... | 7 |

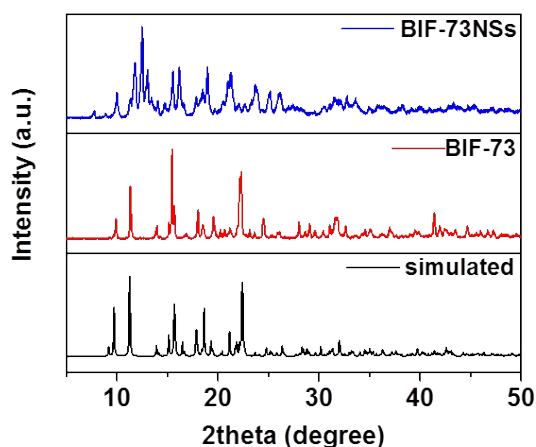

**Figure S1.** PXRD patterns of BIF-73, BIF-73NSs.

The diffraction peak of layered BIF-73NSs is consistent with that of BIF-73, only the peak intensity changed slightly, and the position of the diffraction peak at 10-15 degrees slightly changed. We hypothesize that these changes are due to the fact that the three  $\text{BH}(\text{im})_3^-$  (im = imidazolate) ligands of layered BIF-73NSs unit cell cannot be kept in the same plane or have been twisted after the bulk crystal is exfoliated into layered.

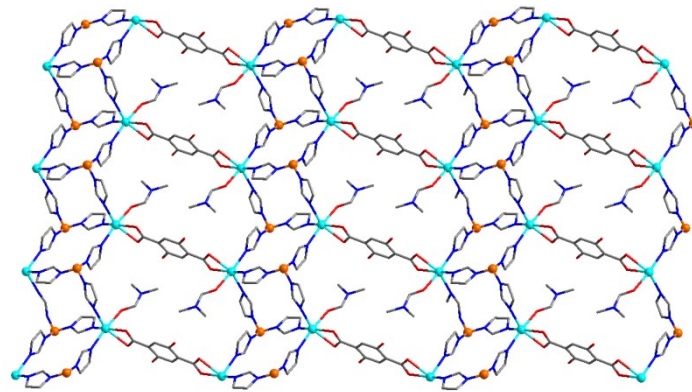

**Figure S2.** The 2,5-dihydroxyterephthalate ligands decorated 2D monolayer structure of BIF-73 crystal.

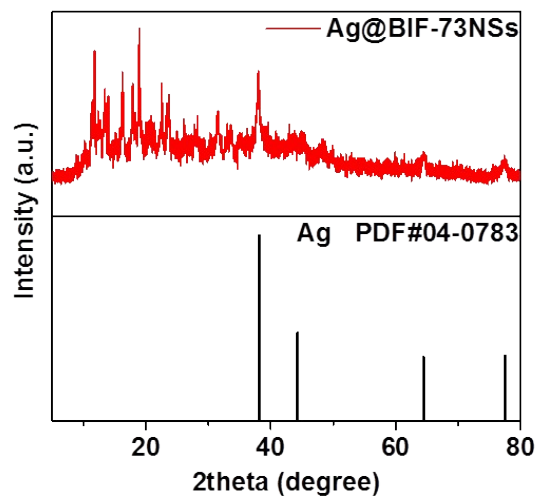

**Figure S3.** PXRD patterns of Ag@BIF-73NSs electrocatalysts.

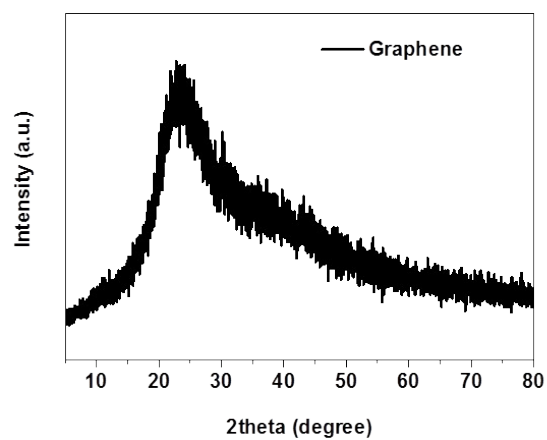

**Figure S4.** PXRD patterns of Graphene.

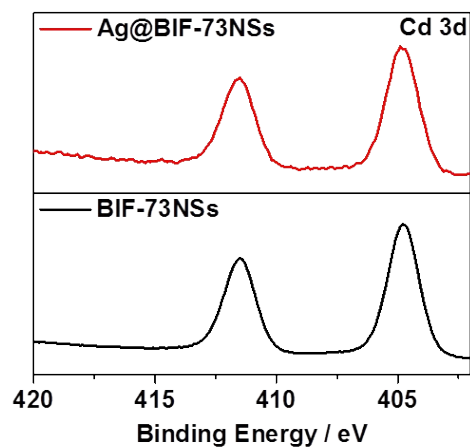

**Figure S5.** High-resolution Cd 3d XPS spectrum of Ag@BIF-73NSs, BIF-73NSs electrocatalysts.

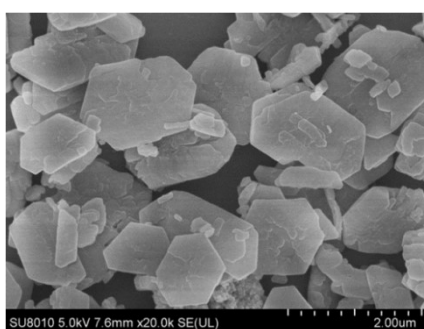

**Figure S6.** SEM images of BIF-73NSs electrocatalysts.

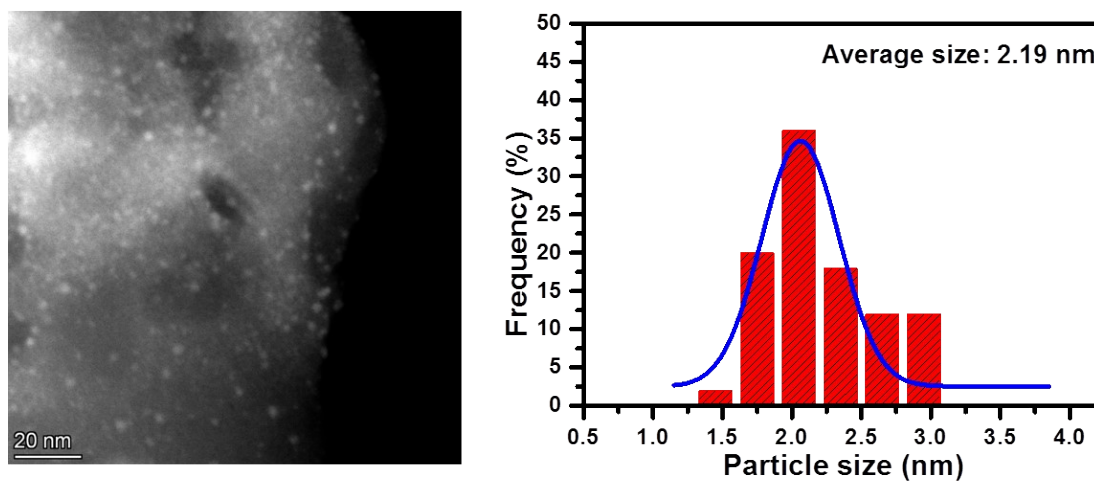

**Figure S7.** TEM images of Ag@BIF-73NSs electrocatalysts.

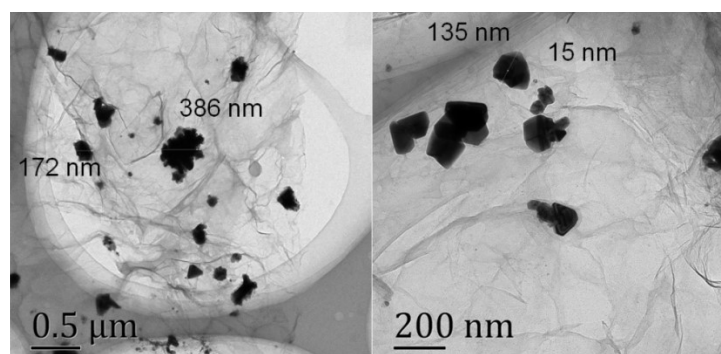

**Figure S8.** TEM images of Ag@Graphene electrocatalysts.

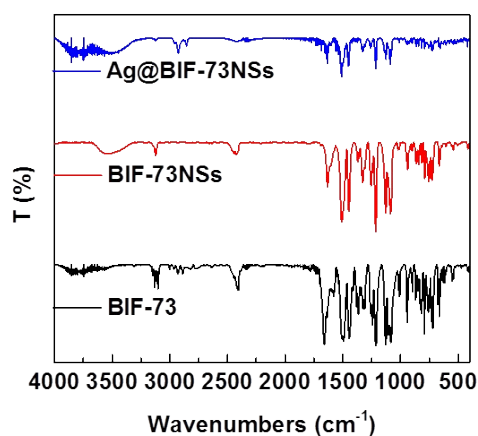

**Figure S9.** Infrared spectra for BIF-73, BIF-73NSs, and Ag@BIF-73NSs electrocatalysts.

FT-IR experiments display that the adsorption peaks located at 1100~1200  $\text{cm}^{-1}$  weaken when introducing  $\text{Ag}^+$  into framework, and the adsorption peaks can be ascribed to the character adsorption of C-OH groups, suggesting that the  $\text{Ag}^+$  had interaction with functional -OH groups in the BIF-73.

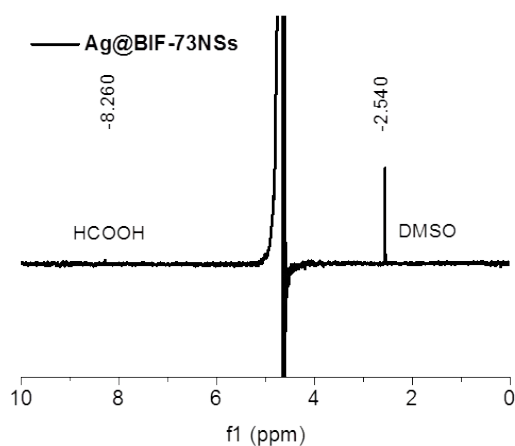

**Figure S10.**  $^1\text{H}$  NMR of the liquid products for Ag@BIF-73NSs after 1 h electrolysis.

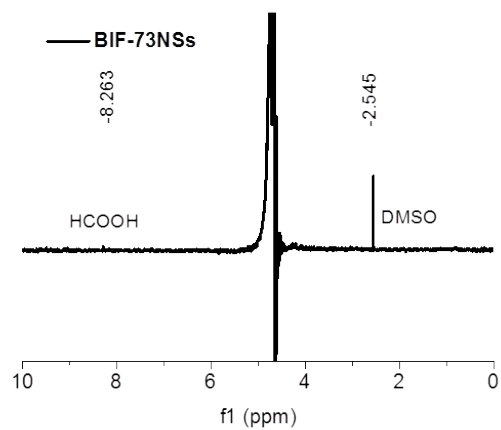

**Figure S11.**  $^1\text{H}$  NMR of the liquid products for BIF-73NSs after 1 h electrolysis.

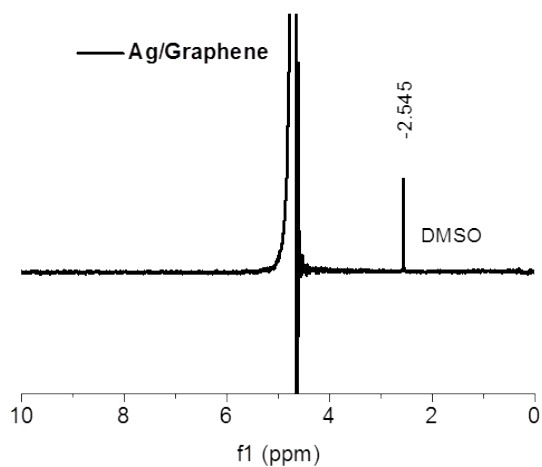

**Figure S12.**  $^1\text{H}$  NMR of the liquid products for Ag@Graphene after 1 h electrolysis.

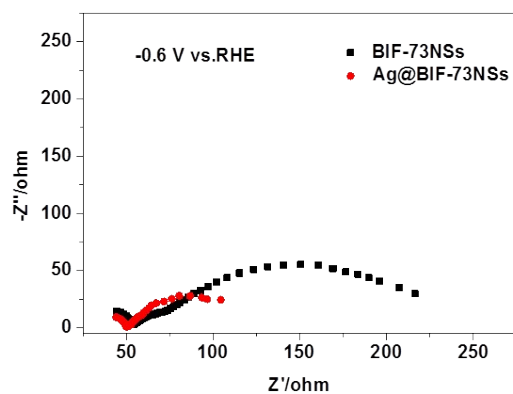

**Figure S13.** Nyquist plots of electrocatalysts over the frequency ranging from 100 kHz to 0.1 Hz at -0.6 V vs. RHE.

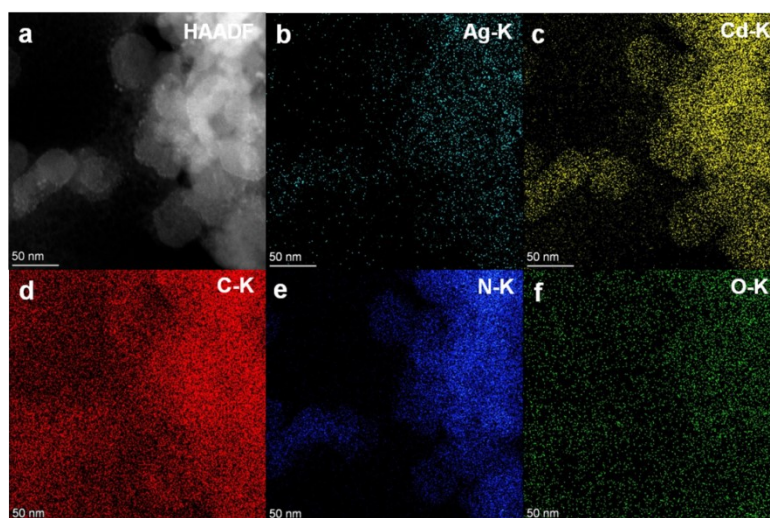

**Figure S14.** The morphology characterization of Ag@BIF-73NSs after electrocatalysis. a) STEM and b) Ag; c) Cd; d) C; e) N; f) O element mapping images.

To further investigate the stability of Ag@BIF-73NSs after CO<sub>2</sub>RR, STEM and energy dispersive X-ray (EDX) elemental mapping tests have been conducted. EDX elemental mapping images show that Ag is uniformly distributed in Ag@BIF-73NSs after CO<sub>2</sub>RR, suggesting the good stability of the Ag@BIF-73NSs after CO<sub>2</sub>RR.

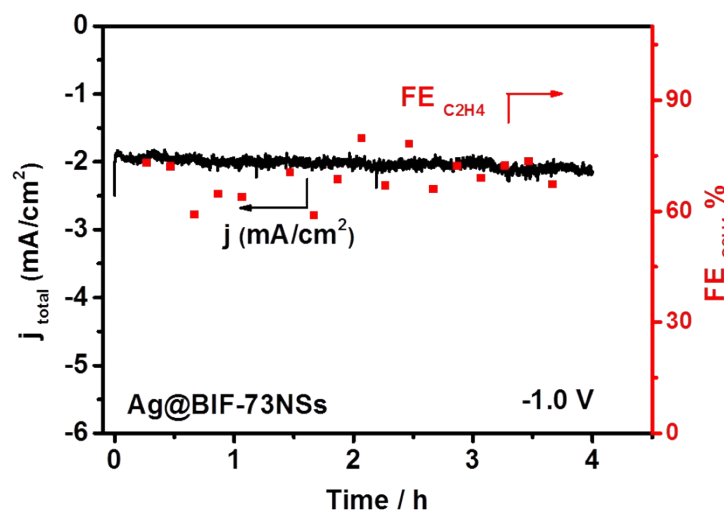

**Figure S15.** The total current density and FE of CO over 4 h electrolysis on Ag@BIF-73NSs catalysts at -1.0 V vs. RHE.

The electrochemistry durability test results reveal that the current density of Ag@BIF-73NSs indicates no significant decay for 4 h at -1.0 V versus RHE; moreover, the FE of CO keeps at  $\approx 60\%$ , implying the Ag@BIF-73NSs can maintain both the activity and selectivity during the CO<sub>2</sub> reduction process.
